# Supplementary material for: Conjugated polymer acceptors based on fused perylene bisimides with a twisted backbone for non-fullerene solar cells
Source: Royal Society of Chemistry journal article supplement (doi:10.1039/c7py00444c), 2017-01-01
Supplement: c7py00444c1.pdf [file c7py00444c1.pdf]

## Supporting Information

### Conjugated Polymer Acceptors based on Fused Perylene Diimides with Twisted Backbone for Non-Fullerene Solar Cells

By Xudong Jiang, Yunhua Xu,\* Xiaohui Wang, Fan Yang, Andong Zhang, Cheng Li,\* Wei Ma\* and Weiwei Li\*

† Department of Chemistry, School of Science, Beijing Jiaotong University, Beijing 100044, P. R. China. E-mail: yhxu@bjtu.edu.cn

‡ Beijing National Laboratory for Molecular Sciences, CAS Key Laboratory of Organic Solids, Institute of Chemistry, Chinese Academy of Sciences, Beijing, 10090, China. E-mail: licheng1987@iccas.ac.cn and liweiwei@iccas.ac.cn

§ State Key Laboratory for Mechanical Behavior of Materials, Xi'an Jiaotong University, Xi'an 710049, PR China. E-mail: msewma@xjtu.edu.cn

### Contents

1. Literature overview of fused PBI molecules and high performance PBI polymers
2. Materials and measurements
3. Synthesis
4. GPC, TGA, DSC and CV plots
5. Solar cells
6. Synthesis of *trans*-polyPBI and its photovoltaic performance
7. AFM
8. NMR spectra and MALDI-TOF
9. References

## 1. Literature overview of fused PBI molecules and high performance PBI polymers

Table S1. Fused PBI molecules and high performance PBI polymers for non-fullerene solar cells reported in the literatures.

|                                                                                                                     |                                                                                                                       |                                                                                                                   |
|---------------------------------------------------------------------------------------------------------------------|-----------------------------------------------------------------------------------------------------------------------|-------------------------------------------------------------------------------------------------------------------|
| 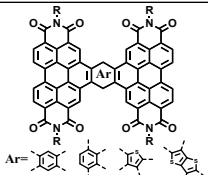 <p>PCE 0.2%-3.9%<br/>Ref. S1.</p> |  <p>PCE 6.1%<br/>Ref. S2 and S3.</p> |  <p>PCE 9.28%<br/>Ref. S4.</p> |
|  <p>PCE 7.7%<br/>Ref. S5.</p>      |  <p>PCE 3.2%-6.7%<br/>Ref S6.</p>    |  <p>PCE 7.33%<br/>Ref S7.</p>   |
|  <p>PCE 7.6%<br/>Ref. S8.</p>     |  <p>PCE 6.5%<br/>Ref. S9.</p>       |  <p>PCE 6.3%<br/>Ref. S10.</p> |
|  <p>PCE 5.0%<br/>Ref. S11.</p>   |                                                                                                                       |                                                                                                                   |

## 2. Materials and measurements

All synthetic procedures were performed under argon atmosphere. Commercial chemicals were used as received. THF and toluene were distilled from sodium under an N<sub>2</sub> atmosphere. The compound **1**,<sup>S12</sup> **2**,<sup>S12</sup> **3**,<sup>S13</sup> and *trans*-PBI<sup>S1</sup> were synthesized according to literature procedures. 2,5-bis(trimethylstannyl)thiophene (**M2**) were purchased from SunaTech Inc. <sup>1</sup>H-NMR and <sup>13</sup>C-NMR spectra were recorded at 500 MHz and 100 MHz on a Bruker AVANCE spectrometer with CDCl<sub>3</sub> as the solvent and tetramethylsilane (TMS) as the internal standard. Molecular weight was determined with GPC at 140 °C on a PL-GPC 220 system using a PL-GEL 10 μm MIXED-B column and *o*-DCB as the eluent against polystyrene standards. Low concentration of 0.1 mg mL<sup>-1</sup> polymer in *o*-DCB was applied to reduce aggregation. TGA measurement was performed on a Perkin-Elmer TGA-7 apparatus. Differential scanning

calorimetry (DSC) was performed on a TA instruments calorimeter (Perkin Elmer Corp DSC8000) at a heating rate of 10 °C min<sup>-1</sup>. Optical absorption spectra were recorded on a JASCO V-570 spectrometer with a slit width of 2.0 nm and a scan speed of 1000 nm min<sup>-1</sup>. Cyclic voltammetry was performed under an inert atmosphere at a scan rate of 0.1 V s<sup>-1</sup> and 1 M tetrabutylammonium hexafluorophosphate in CH<sub>2</sub>Cl<sub>2</sub> as the electrolyte, and an Ag/AgCl as a reference electrode. The counter and reference electrodes were a Pt wire and Ag/AgCl, respectively.

The organic field-effect transistors were fabricated on a commercial Si/SiO<sub>2</sub>/Au substrate purchased from First MEMS Co. Ltd. A heavily N-doped Si wafer with a SiO<sub>2</sub> layer of 300 nm served as the gate electrode and dielectric layer, respectively. The Ti (2 nm)/Au (28 nm) source–drain electrodes were sputtered and patterned by a lift-off technique. Before deposition of the organic semiconductor, the gate dielectrics were treated with octadecyltrichlorosilane (OTS) in a vacuum oven at a temperature of 120 °C, forming an OTS self-assembled monolayers. The treated substrates were rinsed successively with hexane, chloroform, and isopropyl alcohol. Polymer thin films were spin coated on the substrate from solution with a thickness of around 30 – 50 nm. The devices were thermally annealed at 90 °C in air for 10 min, cooled down and then moved into a glovebox filled with N<sub>2</sub>. The devices were measured on an Keithley 4200 SCS semiconductor parameter analyzer at room temperature. The mobilities were calculated from the saturation region with the following equation:  $I_{DS} = (W/2L)C_i\mu(V_G - V_T)^2$ , where  $I_{SD}$  is the drain–source current,  $W$  is the channel width (1400  $\mu$ m),  $L$  is the channel length (50  $\mu$ m),  $\mu$  is the field-effect mobility,  $C_i$  is the capacitance per unit area of the gate dielectric layer, and  $V_G$  and  $V_T$  are the gate voltage and threshold voltage, respectively. This equation defines the important characteristics of electron mobility ( $\mu$ ), on/off ratio ( $I_{on}/I_{off}$ ), and threshold voltage ( $V_T$ ), which could be deduced by the equation from the plot of current–voltage.

Photovoltaic devices with inverted configuration were made by spin-coating a ZnO sol-gel at 4000 rpm for 60 s onto pre-cleaned, patterned ITO substrates. The photoactive layer was deposited by spin coating a chlorobenzene solution containing the polymer PBDB-T and the acceptors and the appropriate amount of DIO as processing additive. MoO<sub>3</sub> (10 nm) and Ag (100 nm) were deposited by vacuum evaporation at ca.  $4 \times 10^{-5}$  Pa as the back electrode.

The active area of the cells was 0.04 cm<sup>2</sup>. The  $J$ - $V$  characteristics were measured by a Keithley 2400 source meter unit under AM1.5G spectrum from a solar simulator (Enlitech model SS-F5-3A). Solar simulator illumination intensity was determined at 100 mW cm<sup>-2</sup> using a monocrystal silicon reference cell with KG5 filter. Short circuit currents under

AM1.5G conditions were estimated from the spectral response and convolution with the solar spectrum. The external quantum efficiency was measured by a Solar Cell Spectral Response Measurement System QE-R3011 (Enli Technology Co., Ltd.). The thickness of the active layers in the photovoltaic devices was measured on a Veeco Dektak XT profilometer.

Atomic force microscopy (AFM) images were recorded using a Digital Instruments Nano scope IIIa multimode atomic force microscope in tapping mode under ambient conditions. GIWAXS measurements were performed at beamline 7.3.3 at the Advanced Light Source. Samples were prepared on Si substrates using blend solutions identical to those used in devices.<sup>S14</sup> The 10 keV X-ray beam was incident at a grazing angle of 0.13° - 0.17°, which maximized the scattering intensity from the samples. The scattered X-rays were detected using a Dectris Pilatus 2M photon counting detector. All film samples were prepared by spin-coating solutions on Si/PEDOT:PSS substrates. The trace amount of DIO was removed under high vacuum before measurement.

R-SoXS transmission measurements were performed at beamline 11.0.1.2<sup>S15</sup> at the Advanced Light Source (ALS). Samples for R-SoXS measurements were prepared on a PEDOT:PSS modified Si substrate under the same conditions as those used for device fabrication, and then transferred by floating in water to a 1.5 mm × 1.5 mm, 100 nm thick Si<sub>3</sub>N<sub>4</sub> membrane supported by a 5 mm × 5 mm, 200 μm thick Si frame (Norcada Inc.). 2-D scattering patterns were collected on an in-vacuum CCD camera (Princeton Instrument PI-MTE). The sample detector distance was calibrated from diffraction peaks of a triblock copolymer poly(isoprene-*b*-styrene-*b*-2-vinyl pyridine), which has a known spacing of 391 Å. The beam size at the sample is approximately 100 μm by 200 μm.

### 3. Synthesis

**cis-PBI.** Compound **1** (200.0 mg, 0.26 mmol) and **3** (54.4 mg, 0.12 mmol) were dissolved in 5 mL toluene. Then, the reaction mixture was flushed with argon for 15 min. Pd<sub>2</sub>(dba)<sub>3</sub> (11.8 mg, 0.013 mmol) and PPh<sub>3</sub> (13.5 mg, 0.052 mmol) were added, and the reaction mixture was stirred at 110 °C for 12 h. After removal of the solvent, the residue was purified by silica gel chromatography (dichloromethane: petroether = 1:1) to give a purple crude product (154 mg). This purple crude product was then dissolved in 500 ml toluene. After adding 5 mg I<sub>2</sub>, this solution was subsequently exposed to sunlight at room temperature for 3 h. After removal of the solvent, the residue was purified by silica gel chromatography

(dichloromethane: petroether =1:1) to afford **cis-PBI** as an orange solid (95.2 mg, 53.3%). <sup>1</sup>HNMR (500MHz, 373 K, CDCl<sub>2</sub>CD Cl<sub>2</sub>): δ 9.83 (s, 2H), 9.59 (s, 2H), 9.50-9.46 (t, 4H), 9.21-9.20 (d, 2H), 9.17-9.15 (d, 2H), 5.44-5.38 (m, 2H), 4.94 (br, 2H), 2.47-2.40(m, 4H), 2.14-2.08 (m, 4H), 1.84 (br, 8H), 1.47-1.16 (m, 48H), 1.16-0.93 (m, 18H), 0.77 (m, 6H). MS (MALDI-TOF): m/z [M<sup>-</sup>] = 1529.7 (calcd for C<sub>98</sub>H<sub>104</sub>N<sub>4</sub>O<sub>8</sub>S<sub>2</sub>: 1529.7). HRMS (MALDI-TOF): m/z calcd for C<sub>98</sub>H<sub>104</sub>N<sub>4</sub>O<sub>8</sub>S<sub>2</sub> [M]<sup>-</sup>: 1528.7301, found 1528.7299.

The compound **4** was prepared by using the same procedures as **cis-PBI** and used directly for the next bromination step without any further purification.

The monomer **M1**. A mixture of **4** (100 mg, 0.045 mmol) and bromine (2.5 ml) in 60 mL concentrated sulfuric acid was stirred at 35 °C in a round-bottom flask for 3 days. The mixture was poured into saturated sodium sulfite solution and the precipitate was collected by vacuum filtration, washed with water and methanol, dried, and purified by column chromatography on silica gel, eluted with petroleum ether/CH<sub>2</sub>Cl<sub>2</sub> (1:1 v/v) to afford **M1** as an orange solid (61.5 mg, 57.4%). The monomer M1 contains two isomers that are impossible to be separated by column chromatography, so they are directly used for polymerization. <sup>1</sup>H NMR (500 MHz, 373 K, CDCl<sub>2</sub>CDCl<sub>2</sub>): δ 10.91-10.85 (m, 2H), 9.88-9.86 (d, 2H), 9.64-9.46 (m, 4H), 9.26-9.15 (m, 2H) 5.40 (br, 2H), 4.91 (br, 2H), 2.44 (br, 4H), 2.11 (br, 4H), 1.81 (br, 8H), 1.55-1.21 (m, 144H), 0.90-0.89 (m, 24H). MS (MALDI-TOF): m/z (M<sup>+</sup>) = 2360.2 (calcd for C<sub>146</sub>H<sub>198</sub>Br<sub>2</sub>N<sub>4</sub>O<sub>8</sub>S<sub>2</sub>: 2360.3). HRMS (MALDI-TOF): m/z calcd for C<sub>146</sub>H<sub>198</sub>Br<sub>2</sub>N<sub>4</sub>O<sub>8</sub>S<sub>2</sub> [M<sup>+</sup>]: 2357.3023, found 2357.3011.

**cis-polyPBI**. To a degassed solution of the **M1** (60.00 mg, 0.025 mmol) and **M2** (10.41 mg, 0.025 mmol) in toluene (2.0 mL) tris(dibenzylideneacetene)dipalladium(0) (0.69 mg, 0.8 μmol) and triphenylphosphine (1.33 mg, 3.2 μmol) were added. The mixture was stirred at 115 °C for 12 h, after which it was precipitated in methanol and filter through a Soxhlet thimble. The polymer was extracted with acetone, hexane and then dissolved in chloroform

(50 mL), which was then precipitated into acetone. Yield: 52.2 mg (89.9%). GPC (*o*-DCB, 140 °C):  $M_n = 18.4 \text{ kg mol}^{-1}$  and PDI = 1.98.

#### 4. GPC, TGA, DSC and CV plots

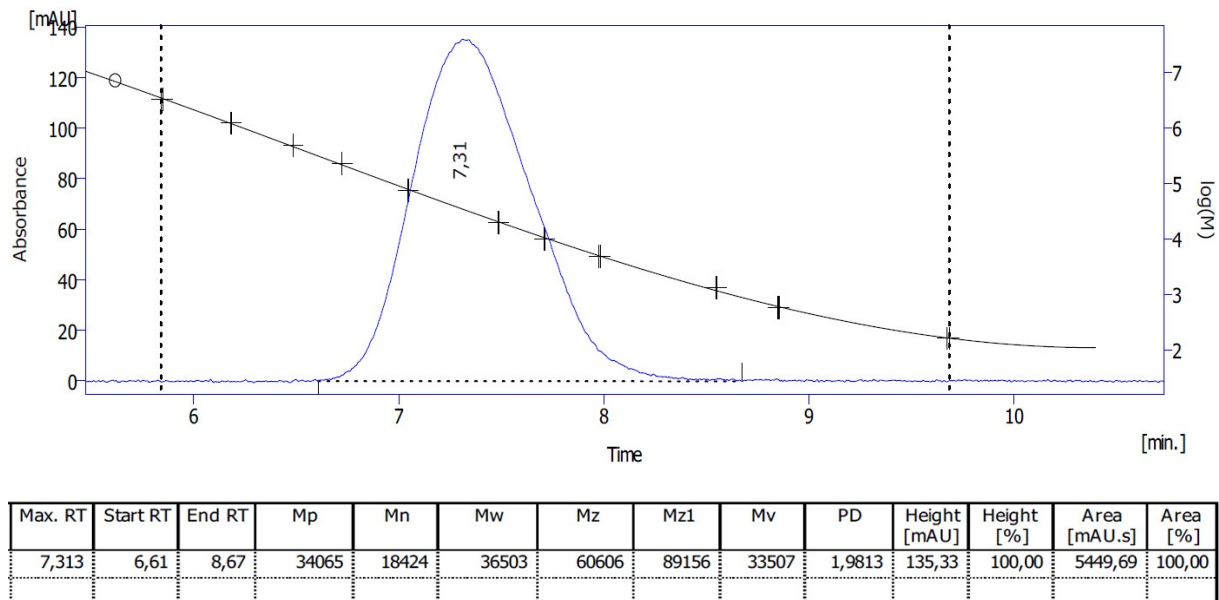

**Fig. S1** GPC recorded at 140 °C with *o*-DCB as eluent for the polymer *cis*-polyPBI.

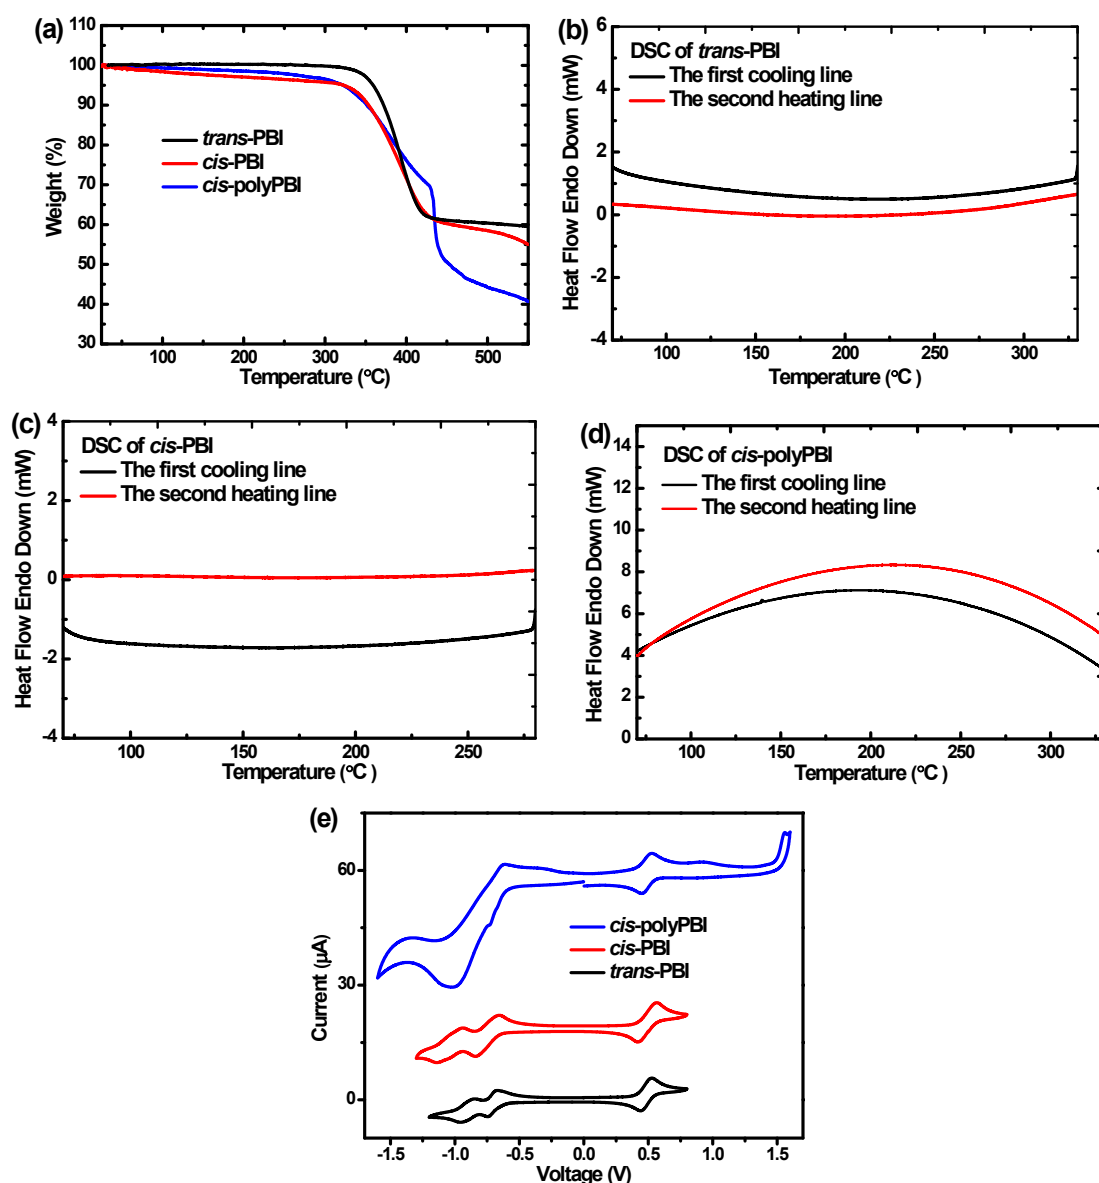

**Fig. S2** (a) TGA plots of the PBI-based conjugated small molecules and polymers with a heating rate of 10 °C/min under N<sub>2</sub> atmosphere. DSC heating and cooling traces of (b) *trans*-PBI, (c) *cis*-PBI and (d) *cis*-polyPBI at a scanning speed of 10 °C/min under N<sub>2</sub> (endo up). (e) Cyclic voltammograms of the acceptors measured in CH<sub>2</sub>Cl<sub>2</sub> at a scan rate of 0.1 V/s with ferrocene as an internal potential marker (V vs Ag/Ag<sup>+</sup>). The plots include the signal of the ferrocene.

## 5. Solar cells

**Table S2.** Optimization of PBDB-T:*trans*-PBI inverted solar cells.

| Ratio | Solvent | Thickness | $J_{sc}$ | $V_{oc}$ | FF | PCE |
|-------|---------|-----------|----------|----------|----|-----|
|-------|---------|-----------|----------|----------|----|-----|

|     |             | [nm] | [mA cm <sup>-2</sup> ] | [V]  |      | [%]  |
|-----|-------------|------|------------------------|------|------|------|
| 1:1 | CB          | 60   | 0.34                   | 1.09 | 0.24 | 0.09 |
| 1:1 | CB:0.2% DIO | 60   | 0.34                   | 1.09 | 0.24 | 0.09 |
| 1:1 | CB:0.5% DIO | 60   | 0.42                   | 1.10 | 0.29 | 0.13 |
| 1:1 | CB:1% DIO   | 60   | 0.36                   | 1.09 | 0.25 | 0.1  |
| 2:1 | CB:0.5% DIO | 60   | 0.17                   | 1.03 | 0.31 | 0.05 |
| 1:1 | CB:0.5% DIO | 60   | 0.42                   | 1.10 | 0.29 | 0.13 |
| 1:2 | CB:0.5% DIO | 60   | 0.17                   | 1.00 | 0.31 | 0.05 |

**Table S3.** Optimization of PBDB-T:*cis*-PBI inverted solar cells.

| Ratio | Solvent     | Thickness<br>[nm] | $J_{sc}$<br>[mA cm <sup>-2</sup> ] | $V_{oc}$<br>[V] | FF   | PCE<br>[%] |
|-------|-------------|-------------------|------------------------------------|-----------------|------|------------|
| 1:1   | CB          | 80                | 11.4                               | 0.97            | 0.50 | 5.7        |
| 1:1   | CB:0.2% DIO | 80                | 11.0                               | 0.94            | 0.63 | 6.8        |
| 1:1   | CB:0.5% DIO | 80                | 11.9                               | 1.00            | 0.64 | 7.6        |
| 1:1   | CB:1% DIO   | 80                | 10.7                               | 0.96            | 0.61 | 6.5        |
| 2:1   | CB:0.5% DIO | 80                | 11.4                               | 1.02            | 0.57 | 6.6        |
| 1:1   | CB:0.5% DIO | 80                | 11.9                               | 1.00            | 0.64 | 7.6        |
| 1:2   | CB:0.5% DIO | 80                | 10.1                               | 1.02            | 0.59 | 6.1        |

**Table S4.** Optimization of PBDB-T:*cis*-polyPBI inverted solar cells.

| Ratio | Solvent     | Thickness<br>[nm] | $J_{sc}$<br>[mA cm <sup>-2</sup> ] | $V_{oc}$<br>[V] | FF   | PCE<br>[%] |
|-------|-------------|-------------------|------------------------------------|-----------------|------|------------|
| 1:1   | CB          | 80                | 10.2                               | 1.0             | 0.62 | 6.2        |
| 1:1   | CB:0.2% DIO | 80                | 10.9                               | 1.0             | 0.58 | 6.3        |
| 1:1   | CB:0.5% DIO | 80                | 10.3                               | 1.01            | 0.60 | 6.3        |
| 1:1   | CB:1% DIO   | 80                | 10.5                               | 1.0             | 0.60 | 6.3        |
| 2:1   | CB:0.5% DIO | 80                | 11.2                               | 1.03            | 0.52 | 6.0        |
| 1:1   | CB:0.5% DIO | 80                | 10.3                               | 1.01            | 0.60 | 6.3        |



|     |             |    |     |      |      |     |
|-----|-------------|----|-----|------|------|-----|
| 1:2 | CB:0.5% DIO | 80 | 7.9 | 1.01 | 0.61 | 4.8 |
|-----|-------------|----|-----|------|------|-----|

**Table S5.** Photovoltaic performances of eight devices based on PBDB-T:*trans*-PBI (1:1).

| Batches | $J_{sc}$<br>(mA cm <sup>-2</sup> ) | $V_{oc}$<br>(V) | FF   | PCE<br>(%) |
|---------|------------------------------------|-----------------|------|------------|
| 1       | 0.42                               | 1.10            | 0.29 | 0.13       |
| 1       | 0.40                               | 1.03            | 0.29 | 0.12       |
| 2       | 0.35                               | 1.06            | 0.30 | 0.11       |
| 2       | 0.41                               | 1.08            | 0.27 | 0.12       |
| 2       | 0.35                               | 1.09            | 0.26 | 0.10       |
| 2       | 0.36                               | 1.07            | 0.31 | 0.12       |
| 3       | 0.40                               | 1.08            | 0.28 | 0.12       |
| 3       | 0.36                               | 1.09            | 0.26 | 0.10       |

**Table S6.** Photovoltaic performances of eight devices based on PBDB-T:*cis*-PBI (1:1).

| Batches | $J_{sc}$<br>(mA cm <sup>-2</sup> ) | $V_{oc}$<br>(V) | FF   | PCE<br>(%) |
|---------|------------------------------------|-----------------|------|------------|
| 1       | 11.88                              | 1.00            | 0.64 | 7.59       |
| 1       | 11.37                              | 0.99            | 0.63 | 7.15       |
| 2       | 11.16                              | 1.00            | 0.64 | 7.05       |
| 2       | 10.98                              | 1.02            | 0.69 | 7.55       |
| 2       | 10.82                              | 1.02            | 0.68 | 7.50       |
| 2       | 11.01                              | 1.00            | 0.66 | 7.30       |
| 3       | 11.37                              | 0.99            | 0.63 | 7.09       |
| 3       | 11.35                              | 0.99            | 0.63 | 7.12       |

**Table S7.** Photovoltaic performances of eight devices based on PBDB-T:*cis*-polyPBI (1:1).

| Batches | $J_{sc}$<br>(mA cm <sup>-2</sup> ) | $V_{oc}$<br>(V) | FF   | PCE<br>(%) |
|---------|------------------------------------|-----------------|------|------------|
| 1       | 10.30                              | 1.01            | 0.60 | 6.30       |
| 1       | 9.61                               | 1.00            | 0.64 | 6.13       |
| 2       | 10.10                              | 1.01            | 0.58 | 5.92       |

|   |       |      |      |      |
|---|-------|------|------|------|
| 2 | 10.30 | 1.01 | 0.58 | 6.01 |
| 2 | 10.14 | 1.00 | 0.62 | 6.28 |
| 2 | 9.76  | 0.98 | 0.64 | 6.12 |
| 3 | 10.38 | 1.00 | 0.58 | 5.93 |
| 3 | 10.15 | 1.00 | 0.60 | 6.09 |

## 6. Synthesis of *trans*-polyPBI and its photovoltaic performance

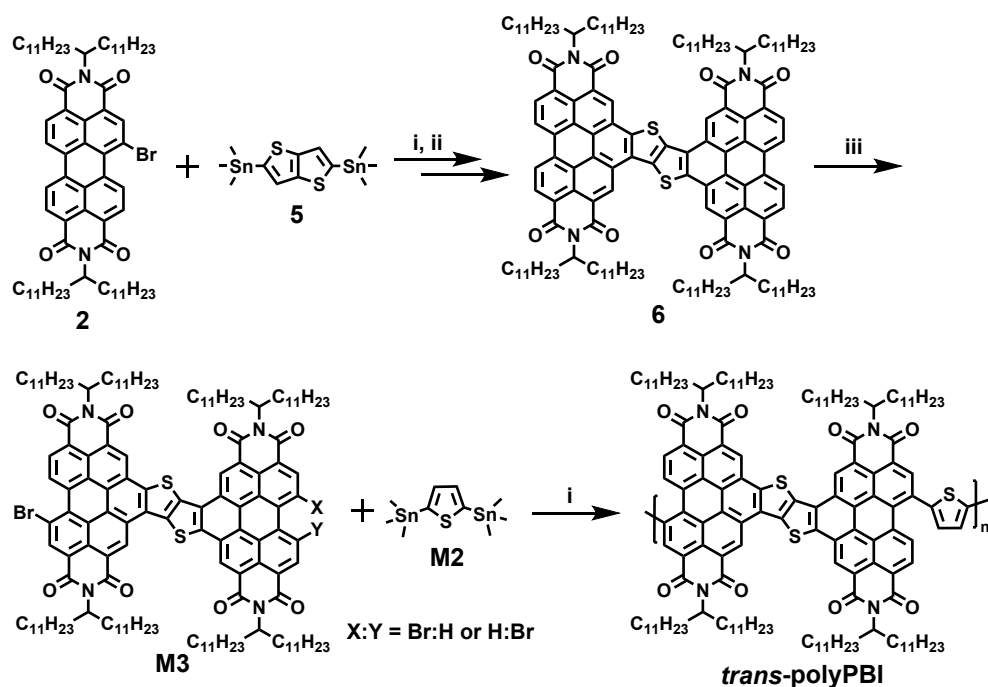

**Scheme S1.** Synthetic procedures of the polymer *trans*-polyPBI. (i) Pd<sub>2</sub>(dba)<sub>3</sub>/PPh<sub>3</sub> in toluene at 115 °C. (ii) I<sub>2</sub>/sunlight in toluene at 25 °C. (iii) Br<sub>2</sub> in H<sub>2</sub>SO<sub>4</sub> at 60 °C.

The monomer **M3**. **M3** was synthesized following the same procedure as compound **M1** with yields of 30.9% while at 60 °C for 3 days respectively. <sup>1</sup>H NMR (500 MHz, 373 K, CDCl<sub>2</sub>CDCl<sub>2</sub>): δ 10.64 (br, 2H), 10.28 (br, 2H), 9.77 (br, 2H), 9.42 (br, 2H), 9.13-9.10 (t, 2H), 5.50 (br, 2H), 5.40 (br, 2H), 2.59 (br, 4H), 2.49 (br, 4H), 2.20 (br, 8H), 1.53-1.28 (m, 144H), 0.87-0.84 (m, 24H). MS (MALDI-TOF): m/z (M<sup>+</sup>) = 2360.0 (calcd for C<sub>146</sub>H<sub>198</sub>Br<sub>2</sub>N<sub>4</sub>O<sub>8</sub>S<sub>2</sub>: 2360.3). HRMS (MALDI-TOF): m/z calcd for C<sub>146</sub>H<sub>198</sub>Br<sub>2</sub>N<sub>4</sub>O<sub>8</sub>S<sub>2</sub> [M<sup>+</sup>]: 2357.3023, found 2357.3018.

**trans-polyPBI.** Same procedure as **cis-polyPBI** was used, **M2** and **M3** were used as the monomers respectively. Yield: 52.6% as a dark red solid. GPC (*o*-DCB, 140 °C):  $M_n = 2.3 \text{ kg mol}^{-1}$ ,  $M_w = 2.9 \text{ kg mol}^{-1}$  and PDI = 1.29.

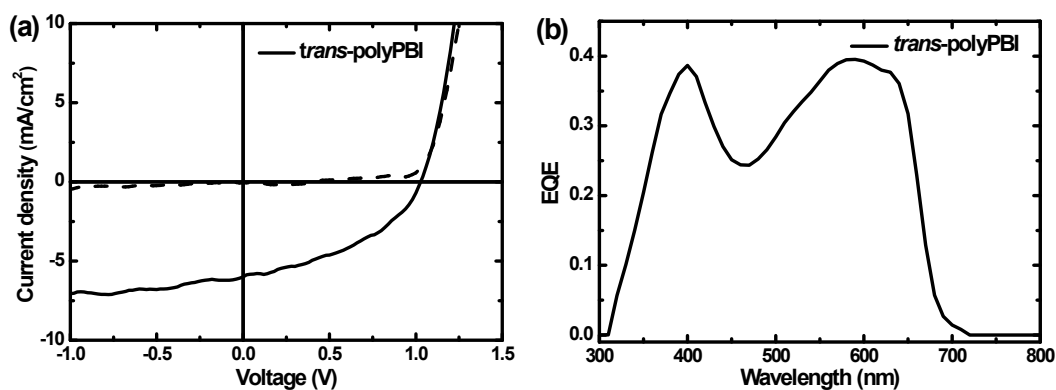

**Fig. S3** (a)  $J$ - $V$  characteristics in dark (dashed lines) and under white light illumination (solid lines) of optimized solar cells based on PBDB-T:trans-polyPBI (1:1) fabricated from CB/DIO (0.5%). (b) EQE of the same devices. The solar cells provided a PCE of 2.6% with  $J_{sc}$  of 6.0 mA cm<sup>-2</sup>,  $V_{oc}$  of 1.02 V and FF of 0.41.

## 7. AFM

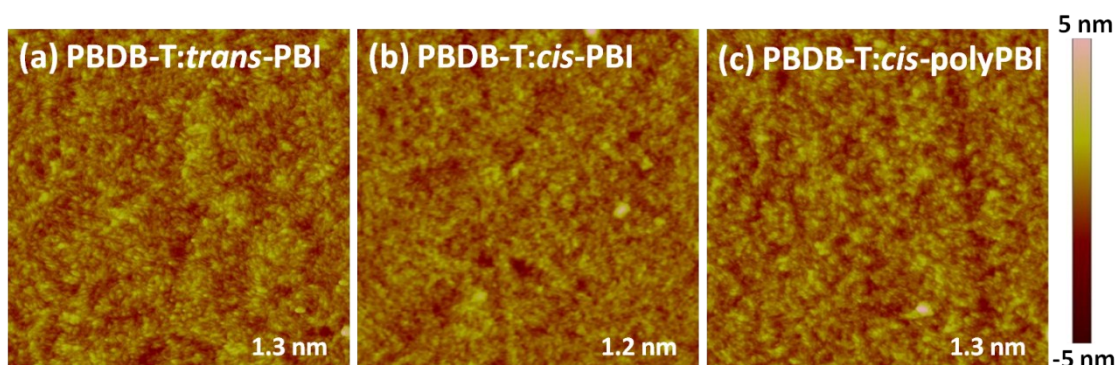

**Fig. S4.** AFM height image (3×3 μm<sup>2</sup>) of the photo-active layers. The fabrication condition is referred to Table 3. The root mean square (RMS) roughness is also included.

## 8. NMR and MALDI-TOF

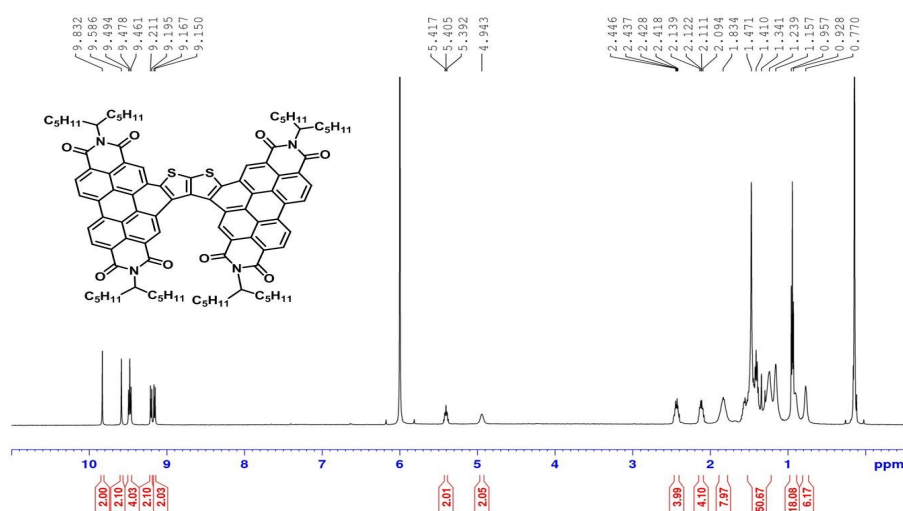

**Fig. S5**  $^1\text{H}$ -NMR of the molecule *cis*-PBI recorded at 100 °C with 1,1,2,2-tetrachloroethane- $\text{d}_2$  as the solvent.

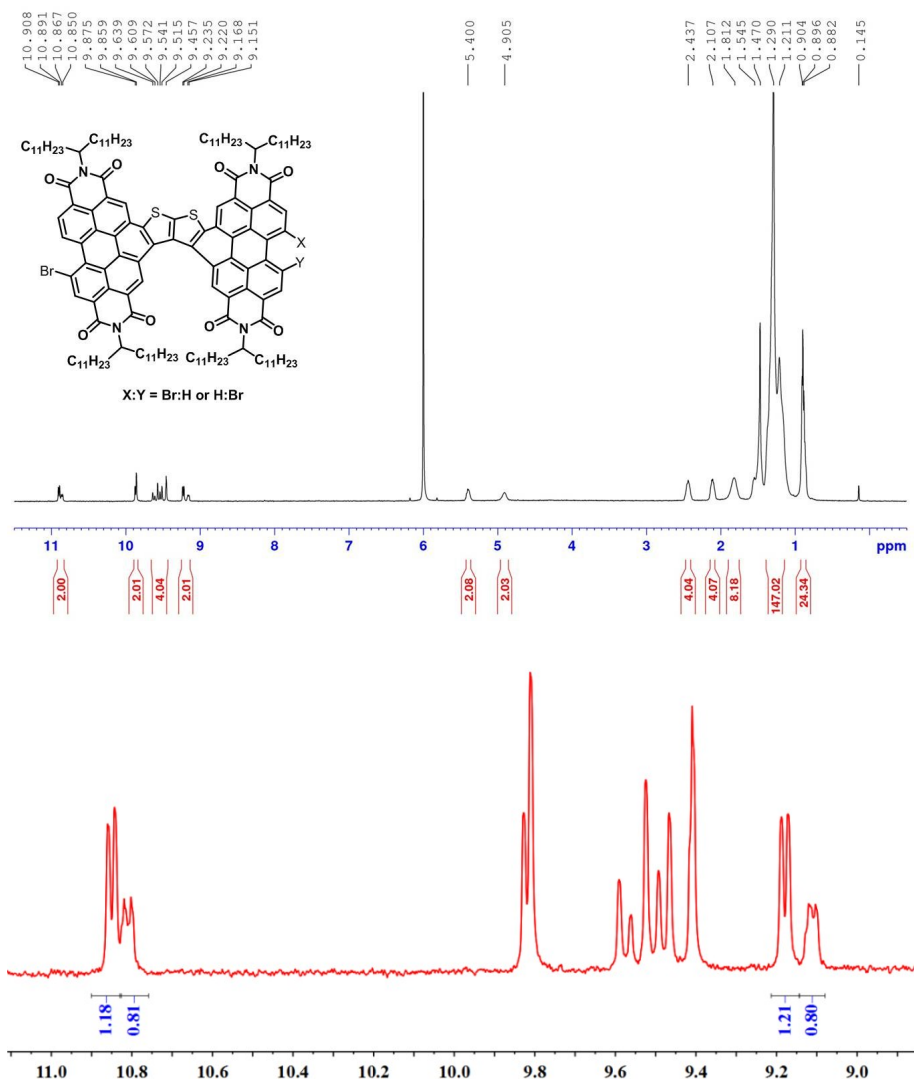

**Fig. S6**  $^1\text{H}$ -NMR of the monomer **M1** recorded at 100 °C with 1,1,2,2-tetrachloroethane- $\text{d}_2$  as the solvent. The NMR spectrum of **M1** at aromatic region was also present, in which the ratio of isomers could be obtained with  $\sim 3:2$ .

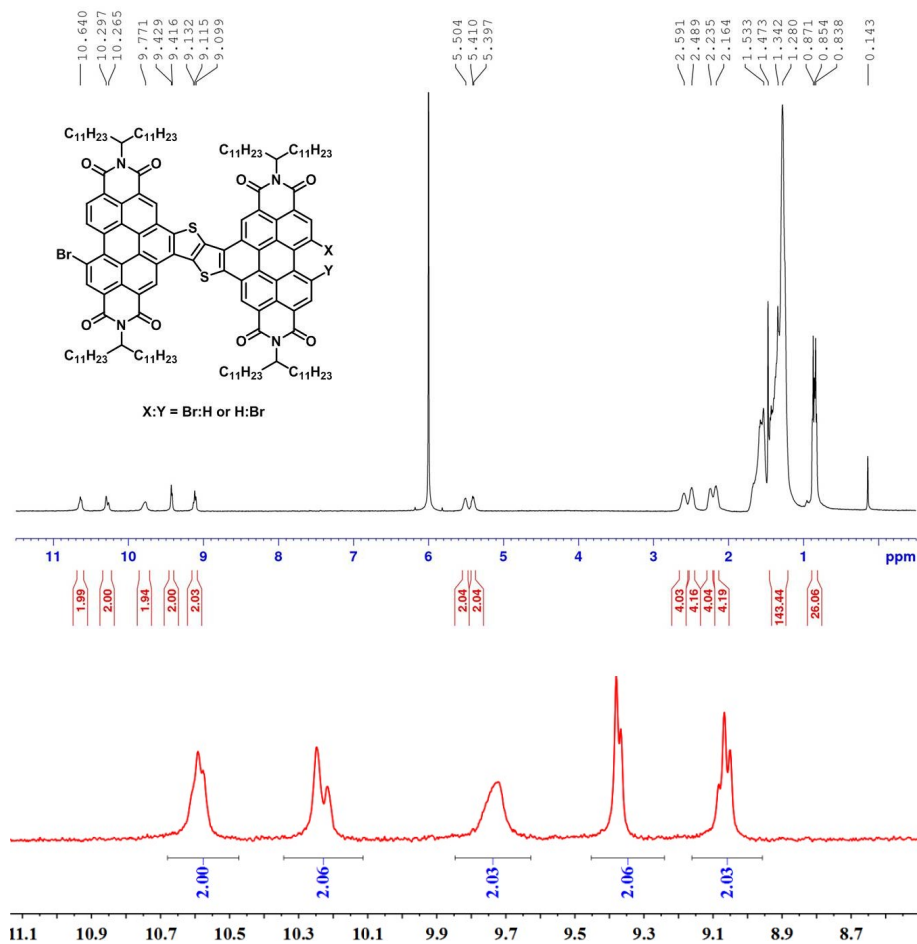

**Fig. S7**  $^1\text{H}$ -NMR of the monomer **M3** recorded at 100 °C with 1,1,2,2-tetrachloroethane- $\text{d}_2$  as the solvent. NMR spectrum of **M3** in the aromatic region was also present, in which the splitting peaks from isomers were impossible to be distinguished.

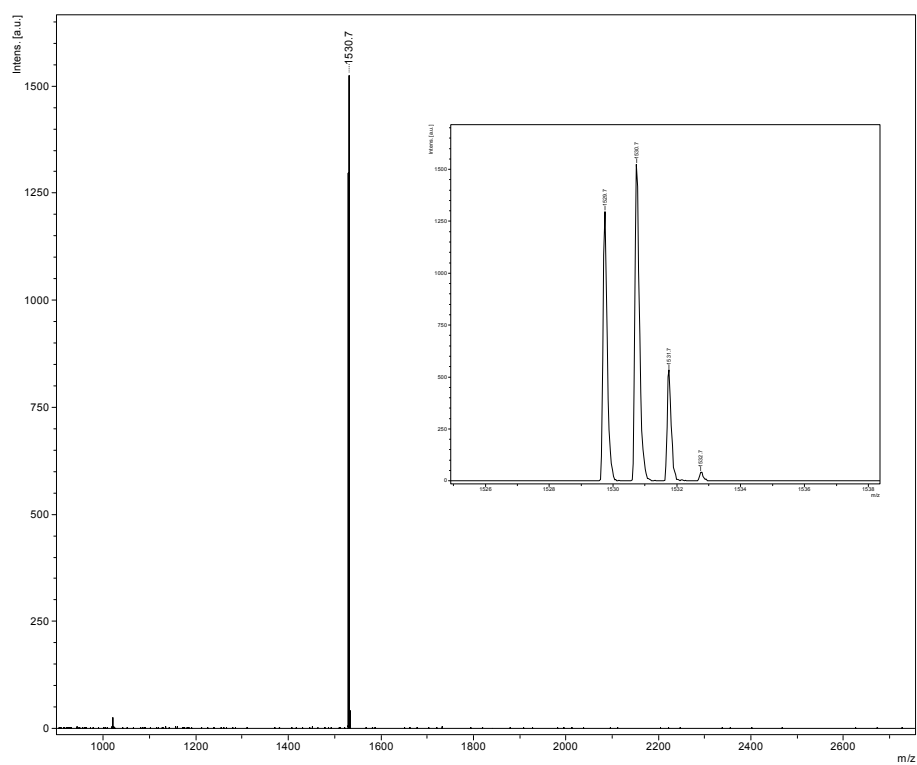

**Fig. S8** MALDI-TOF spectra of *cis*-PBI.

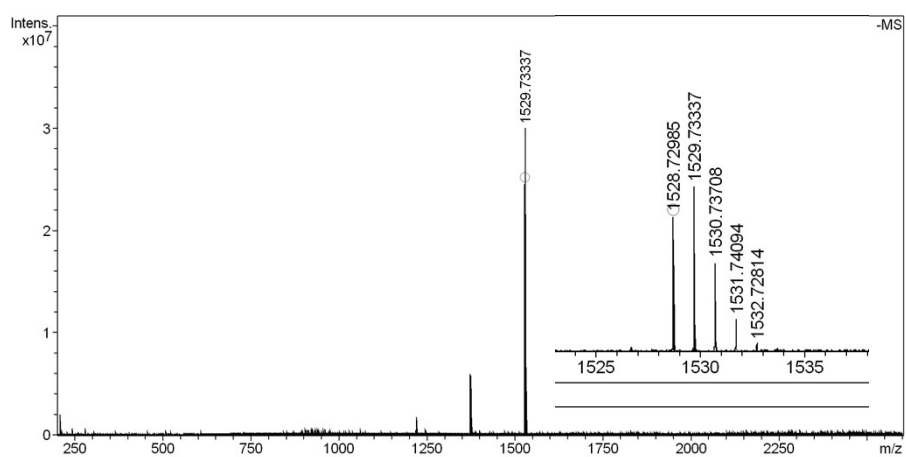

**Fig. S9** High resolution MALDI-TOF spectra of *cis*-PBI.

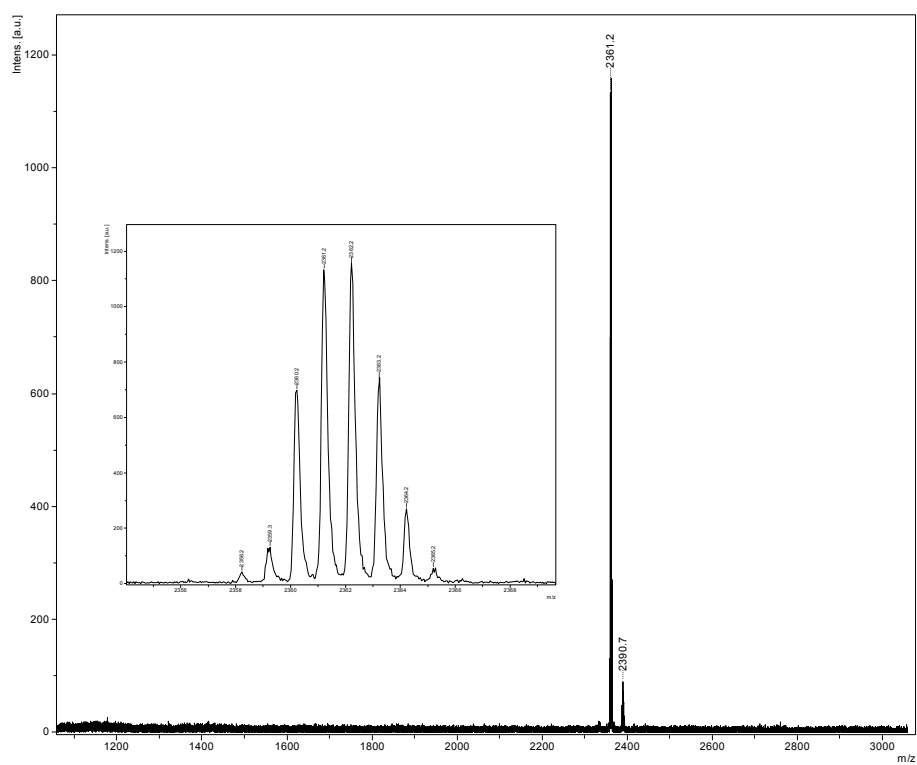

**Fig. S10** MALDI-TOF spectra of the monomer **M1**.

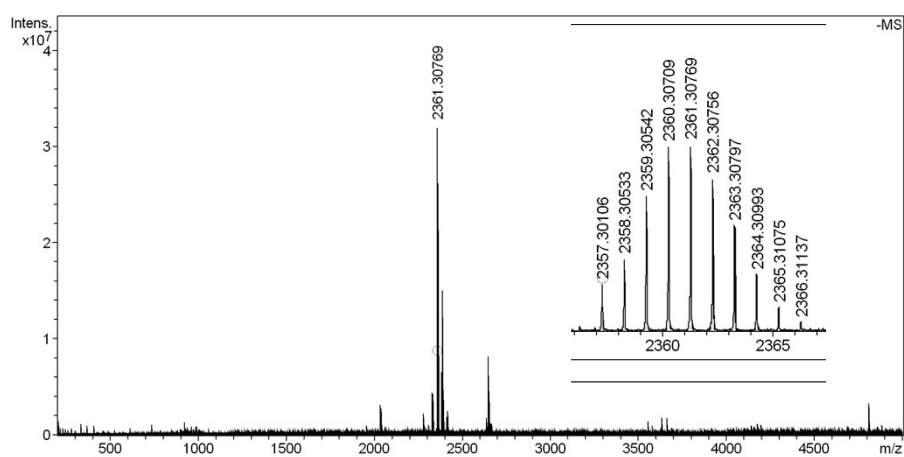

**Fig. S11** High resolution MALDI-TOF spectra of the monomer **M1**.

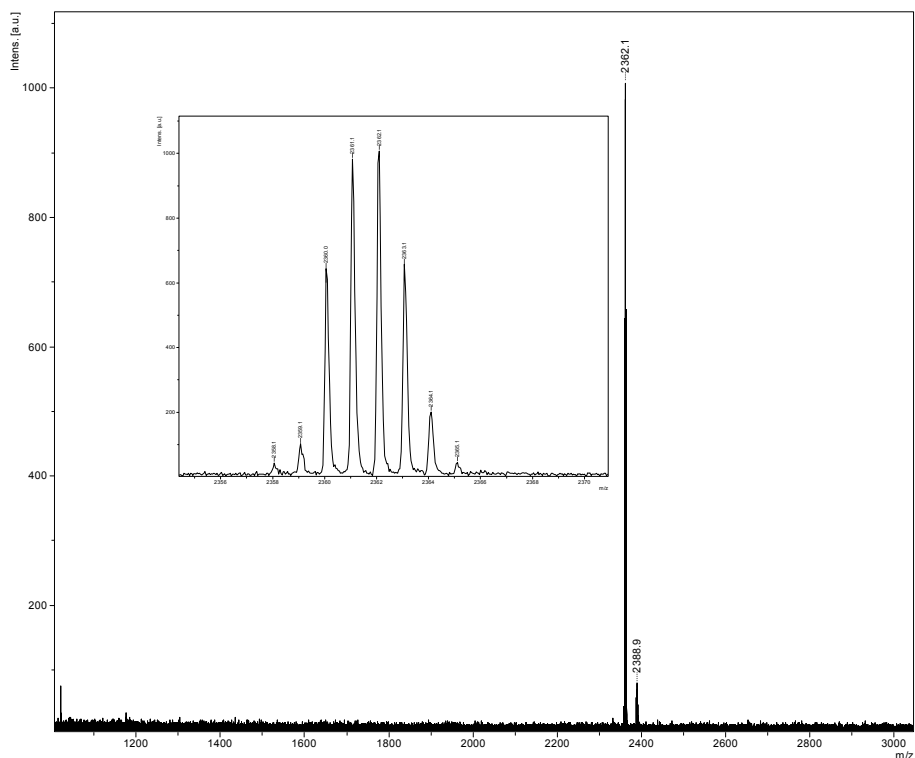

**Fig. S12** MALDI-TOF spectra of the monomer **M3**.

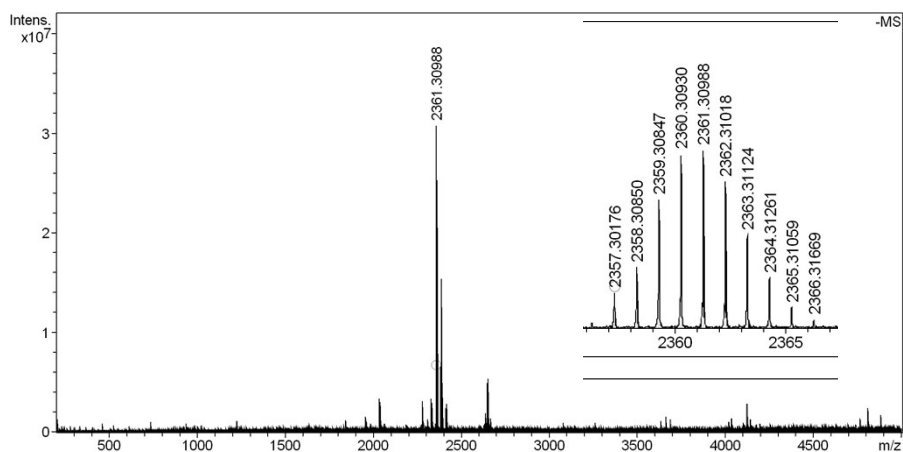

**Fig. S13** High resolution MALDI-TOF spectra of the monomer **M3**.

## 9. References

1. P. E. Hartnett, H. S. S. R. Matte, N. D. Eastham, N. E. Jackson, Y. Wu, L. X. Chen, M. A. Ratner, R. P. H. Chang, M. C. Hersam, M. R. Wasielewski and T. J. Marks, *Chem. Sci.*, 2016, **7**, 3543-3555.
2. Y. Zhong, M. T. Trinh, R. Chen, G. E. Purdum, P. P. Khlyabich, M. Sezen, S. Oh, H. Zhu, B. Fowler, B. Zhang, W. Wang, C.-Y. Nam, M. Y. Sfeir, C. T. Black, M. L. Steigerwald, Y.-L. Loo, F. Ng, X. Y. Zhu and C. Nuckolls, *Nat. Commun.*, 2015, **6**, 8242.
3. Y. Zhong, M. T. Trinh, R. Chen, W. Wang, P. P. Khlyabich, B. Kumar, Q. Xu, C.-Y. Nam, M. Y. Sfeir, C. Black, M. L. Steigerwald, Y.-L. Loo, S. Xiao, F. Ng, X. Y. Zhu and C. Nuckolls, *J. Am. Chem. Soc.*, 2014, **136**, 15215-15221.



4. D. Meng, H. Fu, C. Xiao, X. Meng, T. Winands, W. Ma, W. Wei, B. Fan, L. Huo, N. L. Doltsinis, Y. Li, Y. Sun and Z. Wang, *J. Am. Chem. Soc.*, 2016, **138**, 10184-10190.
5. Q. Wu, D. Zhao, J. Yang, V. Sharapov, Z. Cai, L. Li, N. Zhang, A. Neshchadin, W. Chen and L. Yu, *Chem. Mater.*, 2017, **29**, 1127-1133.
6. H. Zhong, C.-H. Wu, C.-Z. Li, J. Carpenter, C.-C. Chueh, J.-Y. Chen, H. Ade and A. K. Y. Jen, *Adv. Mater.*, 2016, **28**, 951-958.
7. S. Li, W. Liu, C.-Z. Li, T.-K. Lau, X. Lu, M. Shi and H. Chen, *J. Mater. Chem. A*, 2016, **4**, 14983-14987.
8. Y. Guo, Y. Li, O. Awartani, J. Zhao, H. Han, H. Ade, D. Zhao and H. Yan, *Adv. Mater.*, 2016, 8483-8489.
9. S. Li, H. Zhang, W. Zhao, L. Ye, H. Yao, B. Yang, S. Zhang and J. Hou, *Adv. Energy Mater.*, 2016, **6**, 1501991.
10. Y.-J. Hwang, T. Earmme, B. A. E. Courtright, F. N. Eberle and S. A. Jenekhe, *J. Am. Chem. Soc.*, 2015, **137**, 4424-4434.
11. S. Sharma, N. B. Kolhe, V. Gupta, V. Bharti, A. Sharma, R. Datt, S. Chand and S. K. Asha, *Macromolecules*, 2016, **49**, 8113-8125.
12. W. Jiang, L. Ye, X. Li, C. Xiao, F. Tan, W. Zhao, J. Hou and Z. Wang, *Chem. Commun.*, 2014, **50**, 1024-1026.
13. M. Heeney, C. Bailey, K. Genevicius, M. Shkunov, D. Sparrowe, S. Tierney and I. McCulloch, *J. Am. Chem. Soc.*, 2005, **127**, 1078-1079.
14. H. Alexander, B. Wim, G. James, S. Eric, G. Eliot, K. Rick, M. Alastair, C. Matthew, R. Bruce and P. Howard, *Journal of Physics: Conference Series*, 2010, **247**, 012007.
15. E. Gann, A. T. Young, B. A. Collins, H. Yan, J. Nasiatka, H. A. Padmore, H. Ade, A. Hexemer and C. Wang, *Rev. Sci. Instrum.*, 2012, **83**, 045110.
